# Supplementary material for: A New Zebrafish Model to Measure Neuronal α-Synuclein Clearance In Vivo
Source: MDPI journal article supplement (doi:10.3390/genes13050868), 2022-05-12

Figure S1. Generation of transgenic Dendra-tau zebrafish.

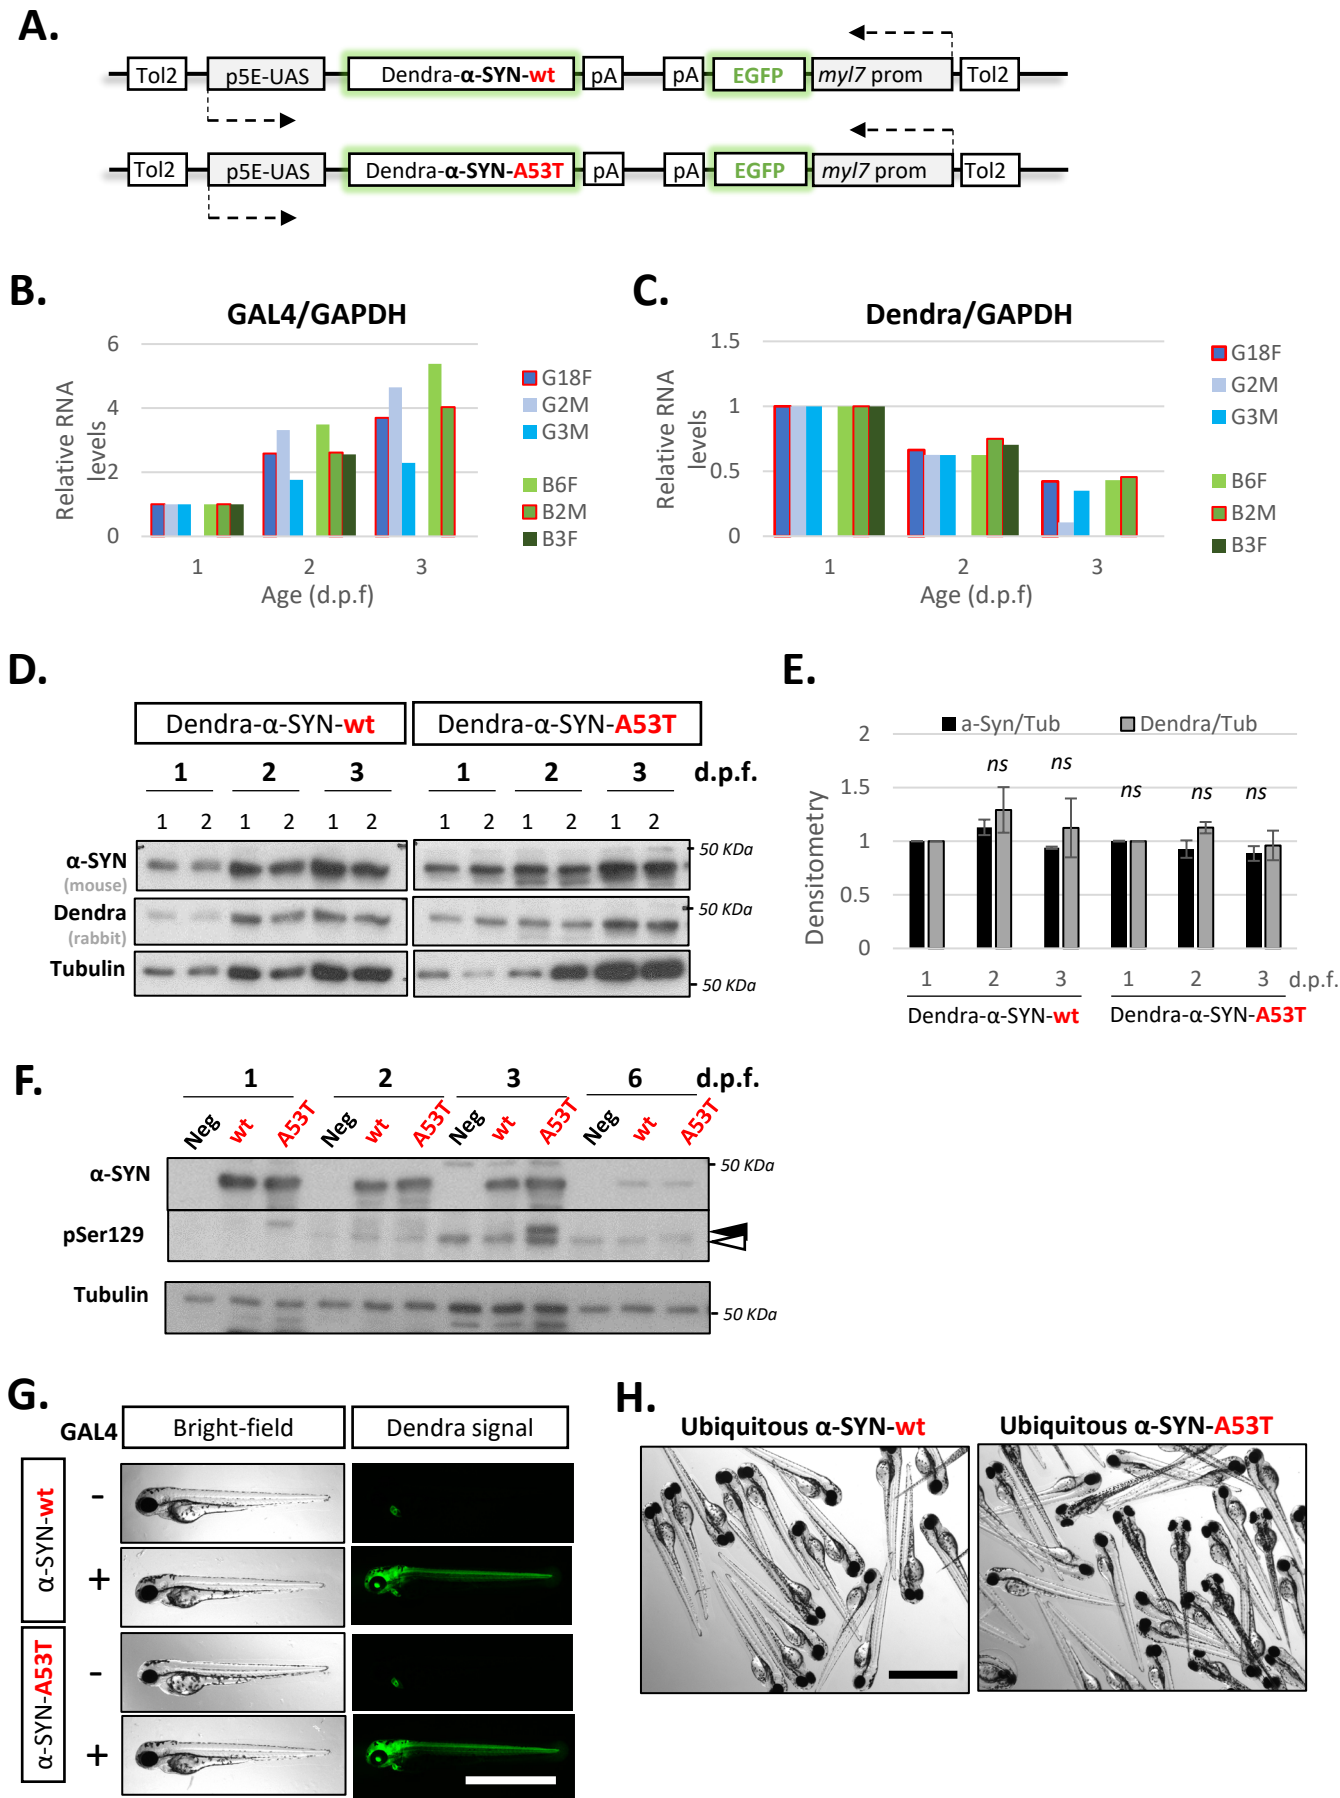

Figure S2. Extended characterisation of neuronal pathology.

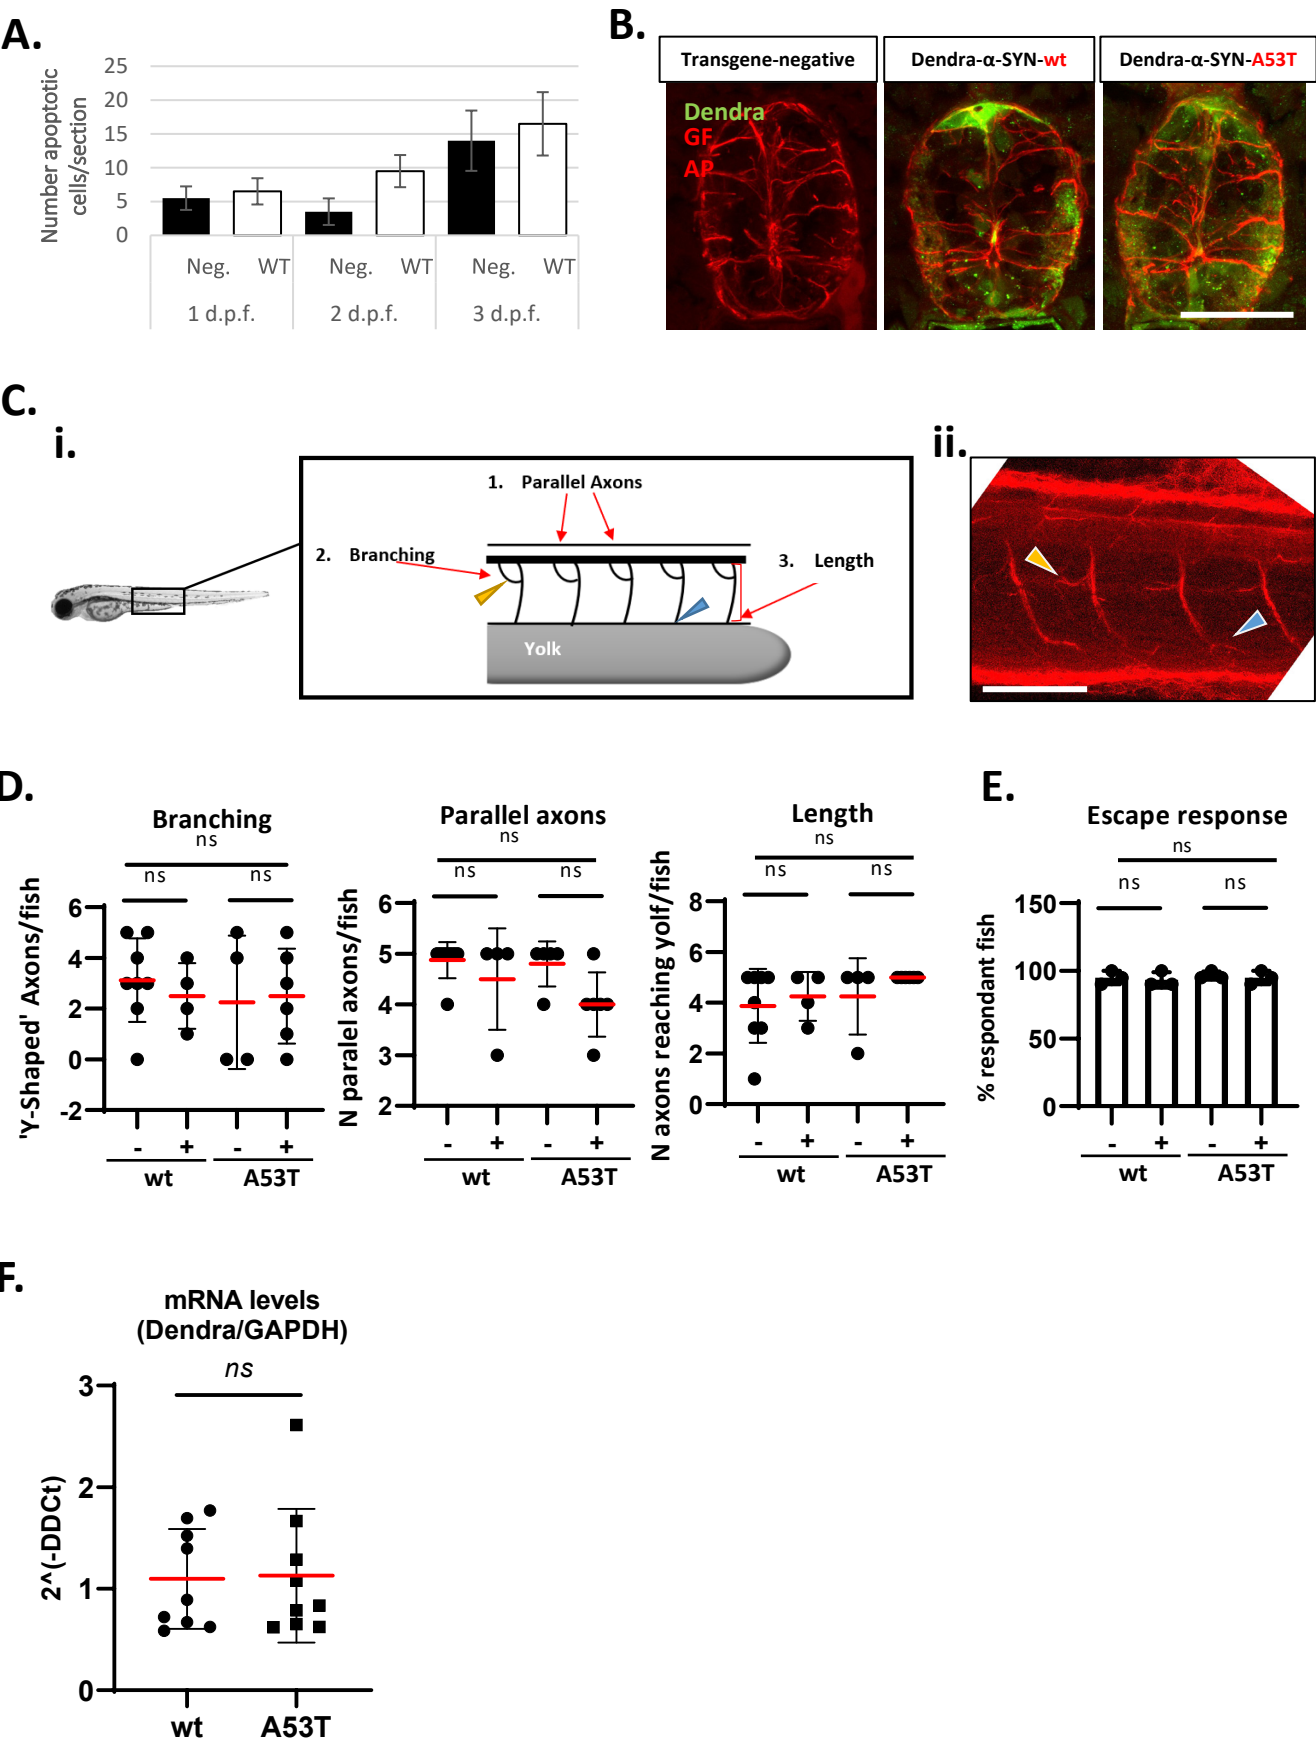

Figure S3: Dendra- $\alpha$ -SYN-wt and A53T expression results in aggregate formation.

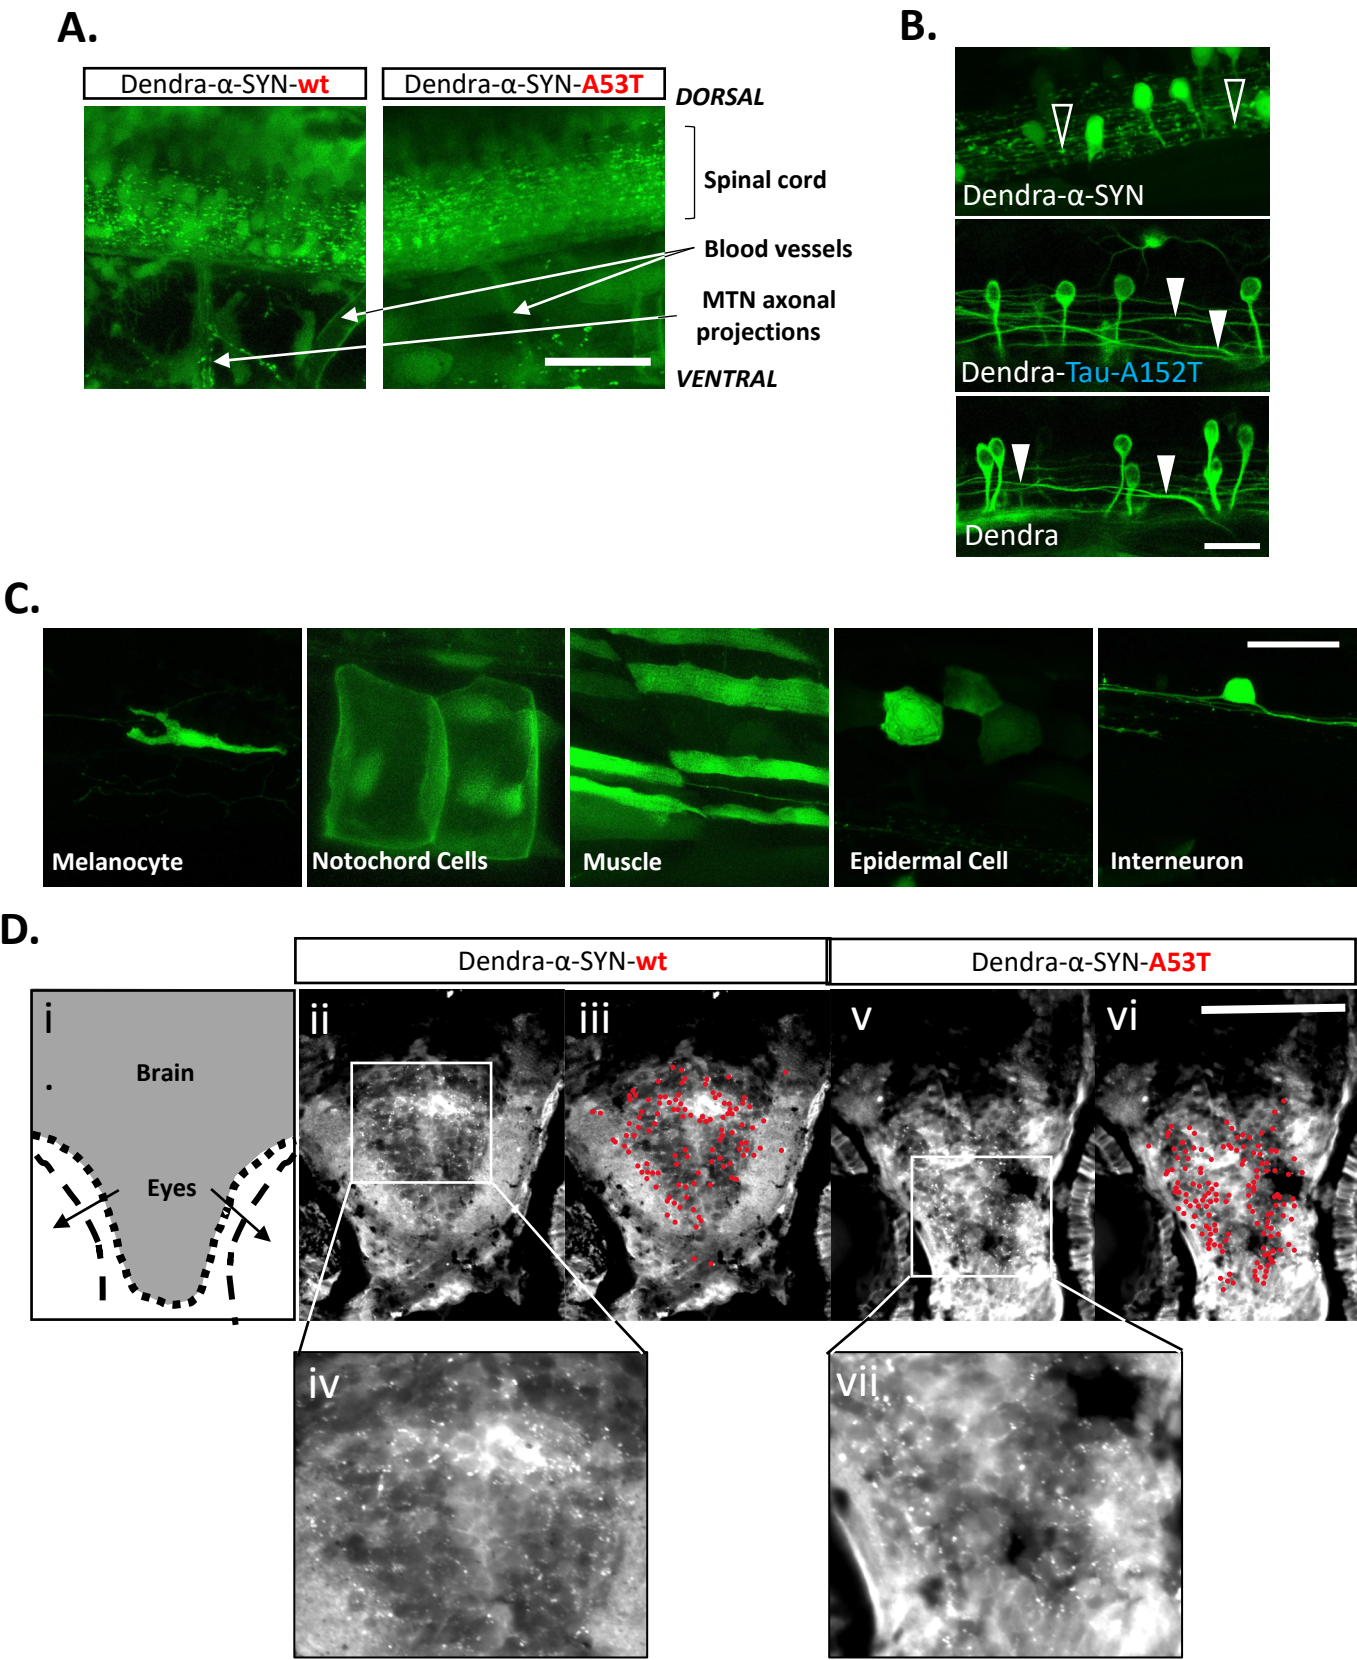



Figure S4. Dendra-positive puncta correspond to aggregate-like structures of Dendra- $\alpha$ -SYN.

A. Cytoplasmic protein: **Acetylated Tubulin**

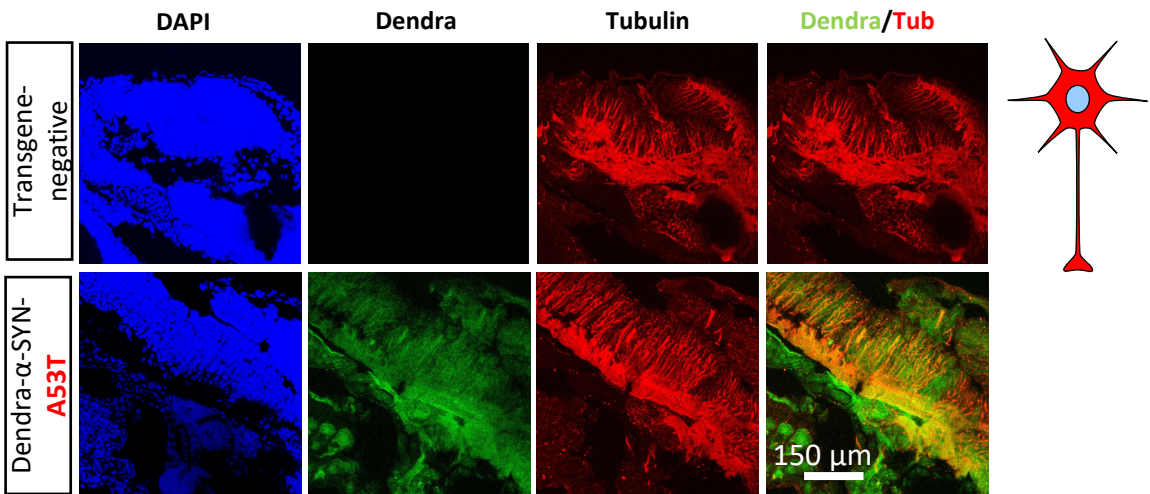

B. Axonal membrane protein: **znp1**

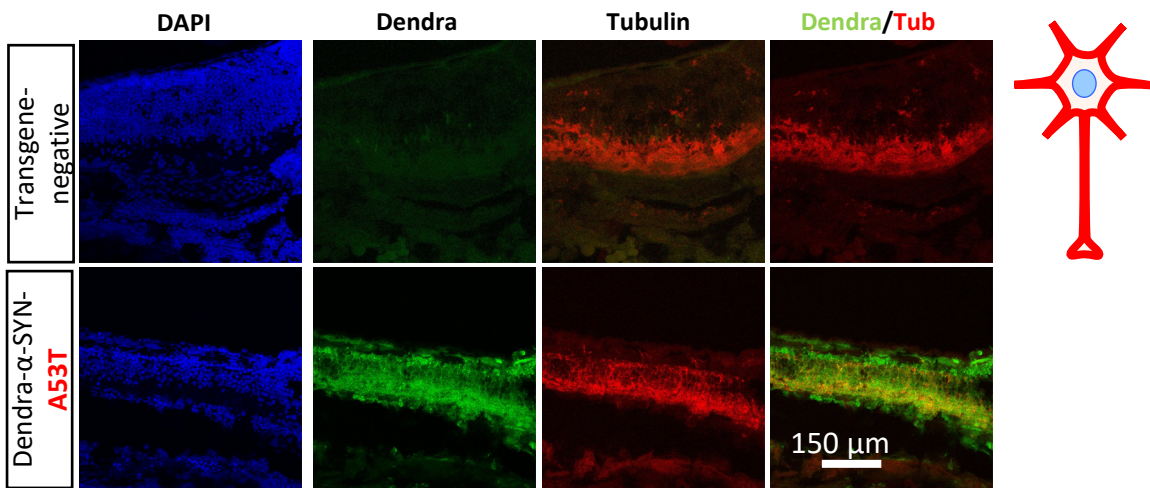

C.

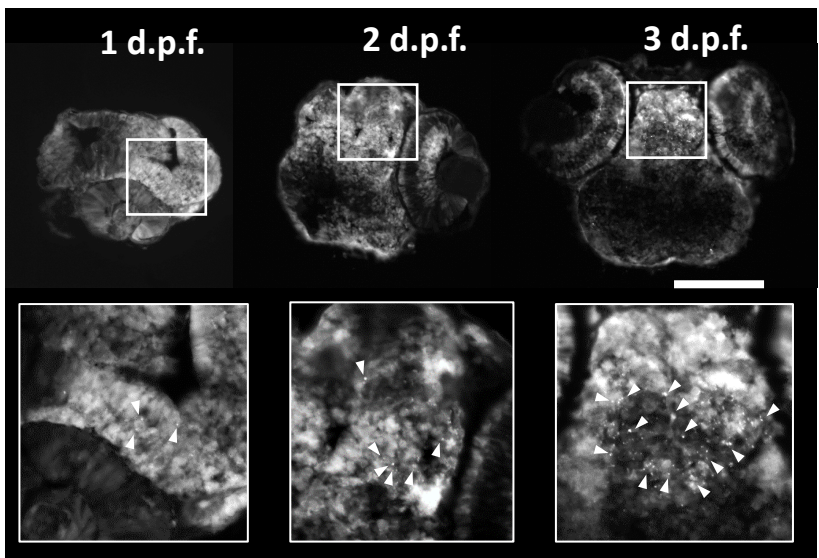

Figure S5. Autophagy inhibition reduces the clearance kinetics of Dendra- $\alpha$ -SYN-wt.

A.

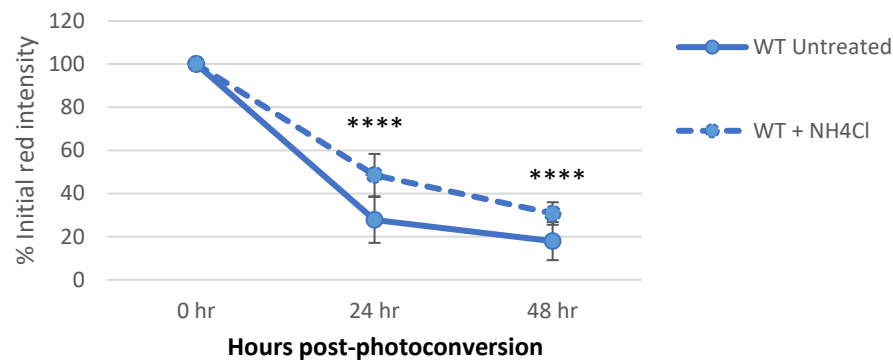

Supplement: s1 [file s1]
