# Supplementary material for: A New Zebrafish Model to Measure Neuronal α-Synuclein Clearance In Vivo
Source: Genes (Basel). 2022 May 12;13(5):868. doi: 10.3390/genes13050868 (PMC9141618; doi:10.3390/genes13050868)
Supplement: Supplementary file 1 [file genes-13-00868-s001.zip]

Archive with 4 entries (4 files):
- Supp Video S1 Negative axonal mitochondria.avi
- Supp Video S2 A53T axonal mitochondria.avi
- Supplementary Figure legends modified for proofreading.pdf
- Supplementary Figures including new data for revision.pdf
